# Supplementary material
Source: Springer Nature journal article supplement (https://www.springermedizin.de/resource/supplementary/12889_2009_1964_MOESM1_ESM.pdf/9485876)

**Population characteristics**

- Predisposing factors
- Enabling factors
- Need factors

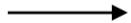

Acculturation

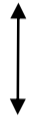

Personal health practices  
Use of health services

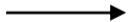

Perceived health status

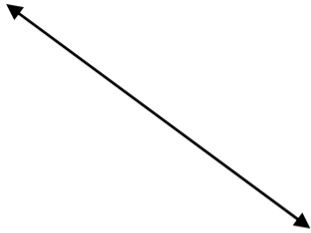

Supplement: MOESM1 [file 9485876]
